# Supplementary material for: Predicting Survival for Veno-Arterial ECMO Using Conditional Inference Trees—A Multicenter Study
Source: MDPI journal article supplement (doi:10.3390/jcm12196243), 2023-09-28
Supplement: s1 [file s1]

**Supplementary Material for:**

**Predicting Survival for Veno-Arterial ECMO Using Conditional Inference  
Trees—A Multicenter Study**

Content of additional tables:

- **Supplementary Table S1. Additional Training Variables of the Comprehensive Data Set**
- **Supplementary Table S2. Comparison of Validation Data Sets Small**
- **Supplementary Table S3. Comparison of Validation Data Sets Comprehensive**

**Supplementary Table S1. Additional Training Variables of the Comprehensive Data Set**

| Training<br>Comprehensive<br>N = 679 |                            |
|--------------------------------------|----------------------------|
| <b>VA-ECMO Characteristics</b>       |                            |
| External insertion <sup>a</sup>      | 62 (9.1%)                  |
| ECMO for Transplantation Tx          |                            |
| insertion after Tx                   | 57 (8.4%)                  |
| insertion during Tx                  | 26 (3.8%)                  |
| insertion pre Tx                     | 7 (1.0%)                   |
| <b>Comorbidities</b>                 |                            |
| SOFA score                           | 11 (8 to 13) [361]         |
| <b>Laboratory values</b>             |                            |
| pH                                   | 7.30 (7.17 to 7.39) [84]   |
| Platelets, G/l                       | 172 (104 to 243) [8]       |
| Leucocytes, G/l                      | 11 (8 to 17) [9]           |
| INR                                  | 1.4 (1.2 to 1.9) [11]      |
| Partial thromboplastin time, sec     | 52 (32 to 134) [155]       |
| thrombin time, sec                   | 29 (18 to 120) [214]       |
| Fibrinogen, g/l                      | 2.6 (1.6 to 4.25) [32]     |
| Coagulation factor V, %              | 36 (17 to 64) [216]        |
| Coagulation factor XIII, %           | 65 (47 to 86) [145]        |
| Urea, mmol/l                         | 7.6 (5.8 to 11.0) [15]     |
| Creatinine, µmol/l                   | 116 (84 to 160) [10]       |
| Bilirubin, µmol/l                    | 13 (7 to 25) [146]         |
| Lactate dehydrogenase, U/l           | 780 (473 to 1579) [47]     |
| Aspartate aminotransferase, U/l      | 113 (40 to 428) [20]       |
| Alanine transaminase, U/l            | 61 (24 to 265) [12]        |
| Gamma-glutamyltransferase, U/l       | 39 (20 to 84) [104]        |
| C-reactive protein, mg/l             | 17 (4 to 77) [16]          |
| Creatine kinase, U/l                 | 350 (127 to 862) [20]      |
| Myoglobin, µg/l                      | 542 (159 to 1466) [31]     |
| Troponin T High Sensitive, ng/l      | 711 (149 to 2697) [84]     |
| NTproBNP, ng/l                       | 3592 (1107 to 11966) [292] |

Beside all variables of Table 1 these additional variables were used in the comprehensive training data set.

Data presents as median and IQR. Categorical variables as number and percentage (%). If necessary, the number of missing data indicates in parentheses [n].

<sup>a</sup> ECMO insertion by University Hospital Zurich outreach team in another hospital before transfer to University Hospital Zurich for definitive care.

Abbreviations: INR, International Normalized Ratio; NTproBNP, N-terminal pro-B-type natriuretic peptide;

SOFA, Sepsis-related organ failure assessment score

**Supplementary Table S2. Comparison of Validation Data Sets Small**

| Node      | 3        | 5          | 6          | 9          | 10       | 11         | Total      |
|-----------|----------|------------|------------|------------|----------|------------|------------|
| Center    |          |            |            |            |          |            |            |
| Würzburg  | 2 (3.5%) | 20 (35.1%) | 1 (1.8%)   | 8 (14.0%)  | 5 (8.8%) | 21 (36.8%) | 57 (100%)  |
| Frankfurt | 3 (3.0%) | 36 (35.6%) | 19 (18.8%) | 29 (28.7%) | 3 (3.0%) | 11 (10.9%) | 101 (100%) |
| Total     | 5 (3.2%) | 56 (35.4%) | 20 (12.7%) | 37 (23.4%) | 8 (5.1%) | 32 (20.3%) | 158 (100%) |

**Supplementary Table S3. Comparison of Validation Data Sets Comprehensive**

| Node      | 4        | 5          | 7          | 8        | 10         | 12         | 13        | Total      |
|-----------|----------|------------|------------|----------|------------|------------|-----------|------------|
| Center    |          |            |            |          |            |            |           |            |
| Würzburg  | 1 (1.9%) | 12 (22.2%) | 6 (11.1%)  | 4 (7.4%) | 12 (22.2%) | 13 (24.1%) | 6 (11.1%) | 54 (100%)  |
| Frankfurt | 3 (3.1%) | 43 (44.8%) | 10 (10.4%) | 1 (1.0%) | 28 (29.2%) | 11 (11.5%) | 0 (0.0%)  | 96 (100%)  |
| Total     | 4 (2.7%) | 55 (36.7%) | 16 (10.7%) | 5 (3.3%) | 40 (26.7%) | 24 (16.0%) | 6 (4.0%)  | 150 (100%) |
